# Supplementary material
Source: PubMed Central journal article supplement (PMC10209175)
Supplement: 41386_2023_1540_MOESM1_ESM.pdf [file 41386_2023_1540_MOESM1_ESM.pdf]

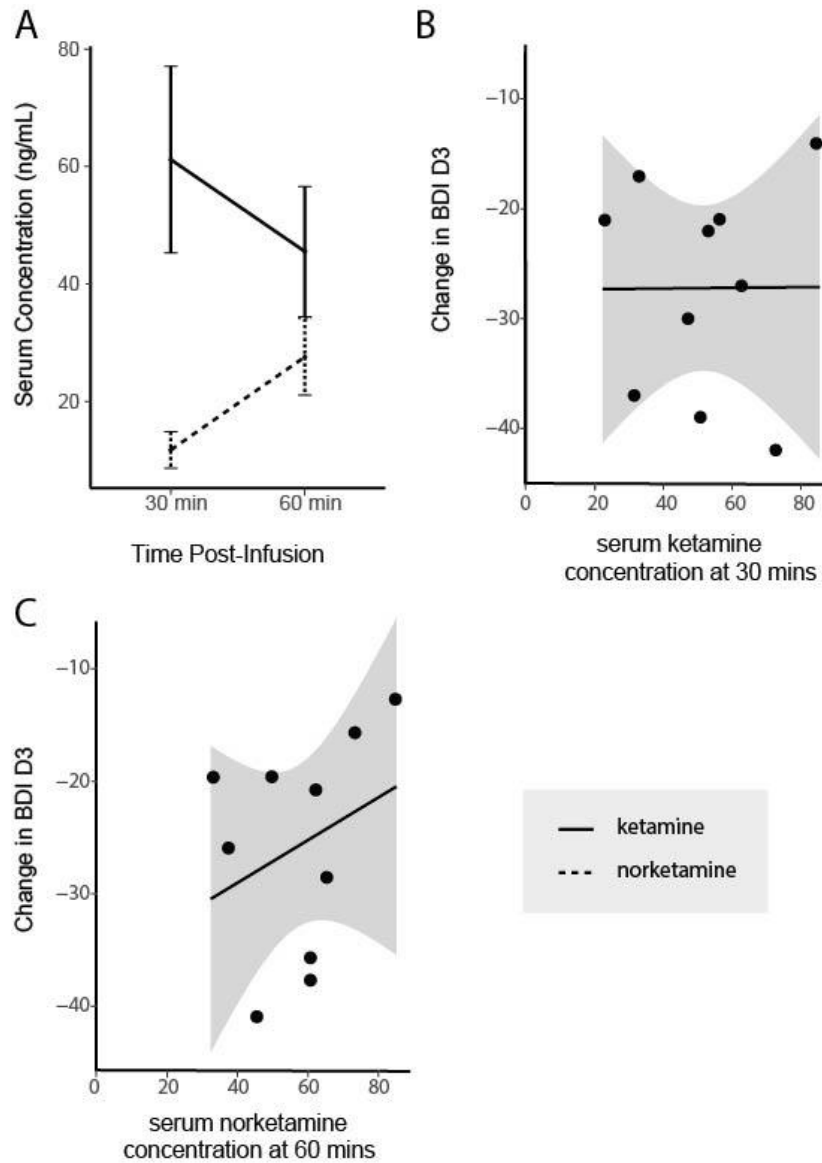

**Supplemental Figure 1. A)** Ketamine and norketamine levels at 30 min (three-fourths of the infusion had been delivered at this time) and 60 min (20 min after infusion end). Error bars in panel A represent standard error of the mean. **B, C)** Scatterplots with serum drug or metabolite concentration versus change in depressive symptoms as measured by BDI score at Day 3 (BDI D3) for each individual in the ketamine group. Correlations were not significant (see statistics results in text). Abbreviations: minutes (min), Beck Depression Inventory at timepoint Day 3 (BDI D3).

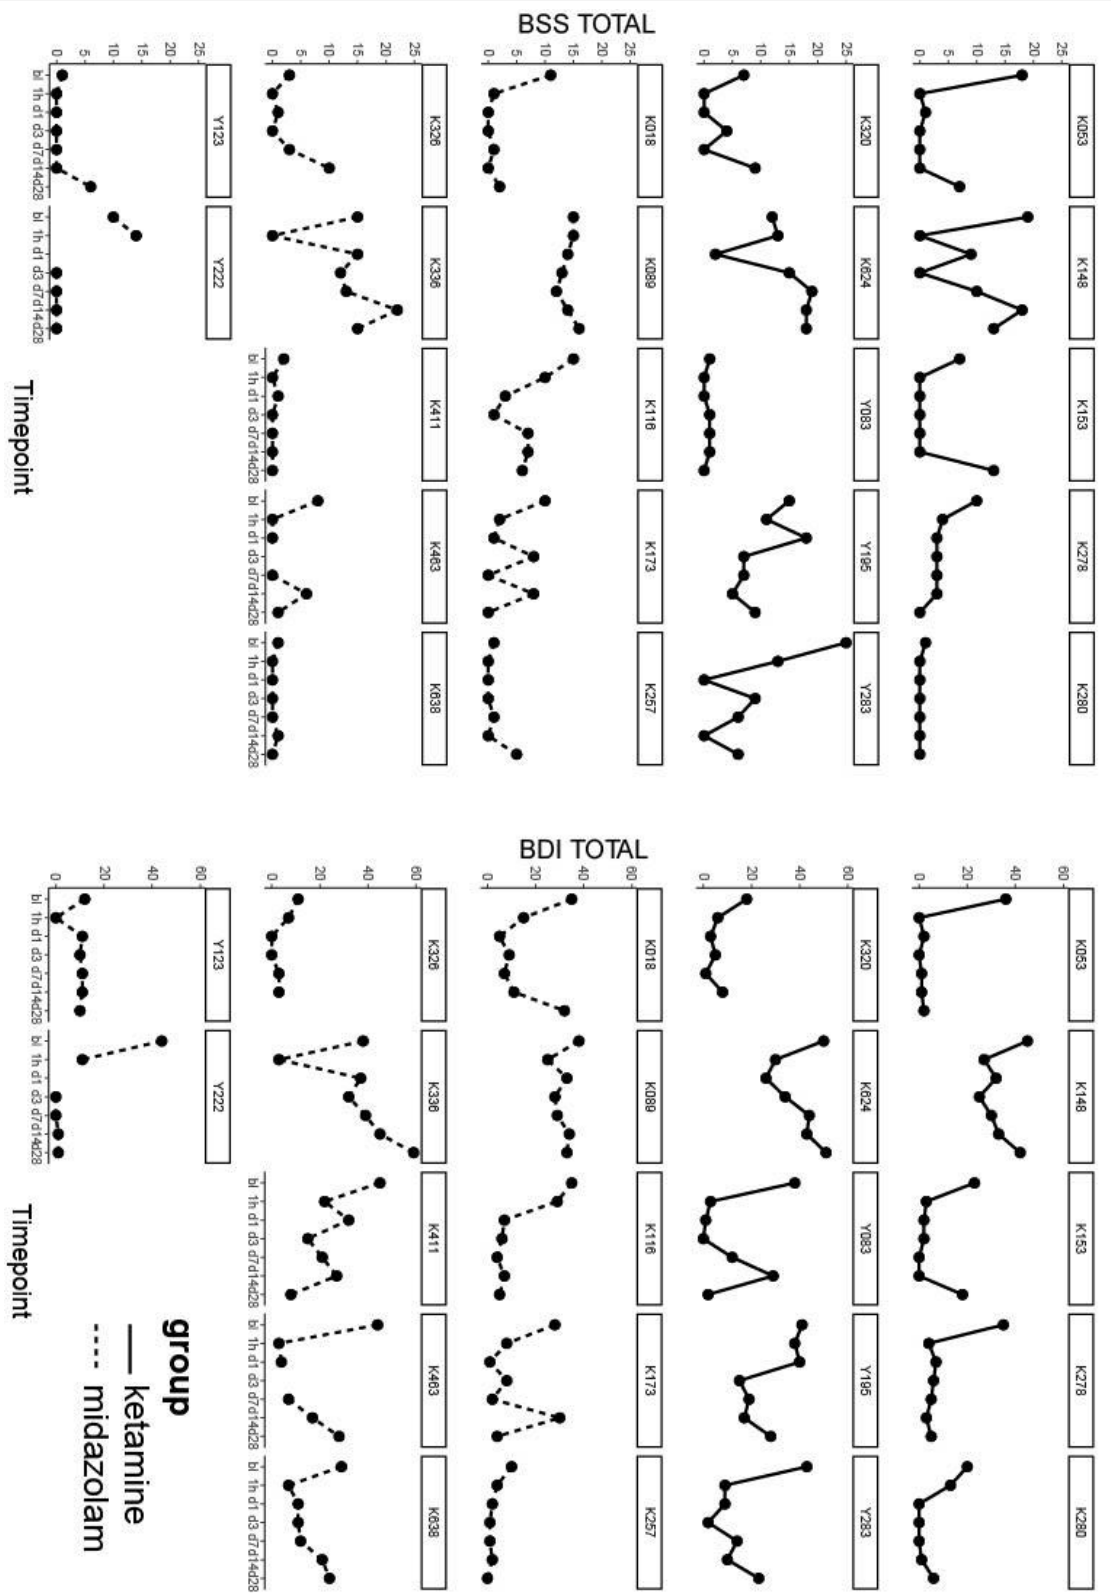

**Supplemental Figure 2.** Trajectories of suicidal ideation and depression for each individual study participant. Abbreviations: Beck Scale for Suicide Ideation (BSS), Beck Depression Inventory (BDI), Baseline (bl), 1 hour (1h), Day 1 (d1), Day 3 (d3), Day 7 (d7), Day 14 (d14), Day 28 (d28).
